# Supplementary material for: Assessment of the Vulnerability of the Lucana Coastal Zones (South Italy) to Natural Hazards
Source: MDPI journal article supplement (doi:10.3390/jmse10070888), 2022-06-28
Supplement: s1 [file s1]

## Supplementary Material

**Table S1:** Determination of the weights for the morphological vulnerability indicators “V” and “H”.

|   | INDICATOR                                                   |         | RA | FP | SI | SC | DF | VS | GS | CS          |
|---|-------------------------------------------------------------|---------|----|----|----|----|----|----|----|-------------|
|   | Characteristic value                                        |         | 5  | 1  | 2  | 5  | 1  | 2  |    |             |
| H | Erosion rate                                                | Tr =1   | 4  | 4  | 1  | 4  | 1  | 1  | 1  | <b>0.77</b> |
|   |                                                             | Tr =10  | 4  | 4  | 2  | 4  | 2  | 2  | 1  | <b>0.84</b> |
|   |                                                             | Tr =25  | 4  | 4  | 3  | 4  | 3  | 3  | 1  | <b>0.92</b> |
|   |                                                             | Tr =100 | 4  | 4  | 4  | 4  | 4  | 4  | 1  | <b>1.00</b> |
| V | Presence of coastal dune                                    |         | 4  | 1  | 1  | 4  | 1  | 1  | 2  | <b>0.72</b> |
| V | Defence structure                                           |         | 4  | 4  | 4  | 4  | 2  | 4  | 1  | <b>0.97</b> |
| H | Shoreline evolution                                         |         | 4  | 4  | 4  | 4  | 2  | 4  | 1  | <b>0.97</b> |
| V | Variation of the dune system length                         |         | 4  | 3  | 4  | 4  | 4  | 2  | 1  | <b>0.92</b> |
| V | Submerged beach slope                                       |         | 4  | 3  | 4  | 4  | 4  | 2  | 1  | <b>0.92</b> |
| H | Exposition and intensity of sea storms                      |         | 4  | 2  | 4  | 4  | 4  | 2  | 1  | <b>0.91</b> |
| V | Harbour structures                                          | Tr =1   | 4  | 4  | 4  | 4  | 4  | 4  | 1  | <b>1.00</b> |
|   |                                                             | Tr =10  | 4  | 2  | 2  | 2  | 2  | 2  | 2  | <b>0.66</b> |
|   |                                                             | Tr =25  | 4  | 3  | 3  | 3  | 3  | 3  | 1  | <b>0.83</b> |
|   |                                                             | Tr =100 | 4  | 1  | 1  | 1  | 1  | 1  | 3  | <b>0.48</b> |
| V | Coastal waterproof level                                    | Tr =1   | 4  | 1  | 1  | 1  | 1  | 1  | 3  | <b>0.48</b> |
|   |                                                             | Tr =10  | 4  | 2  | 2  | 2  | 2  | 2  | 2  | <b>0.66</b> |
|   |                                                             | Tr =25  | 4  | 3  | 3  | 3  | 3  | 3  | 1  | <b>0.83</b> |
|   |                                                             | Tr =100 | 4  | 4  | 4  | 4  | 4  | 4  | 1  | <b>1.00</b> |
| V | Distance from the shoreline to the limit of the active zone | Tr =1   | 4  | 4  | 4  | 4  | 4  | 4  | 1  | <b>1.00</b> |
|   |                                                             | Tr =10  | 4  | 2  | 2  | 2  | 2  | 2  | 2  | <b>0.66</b> |
|   |                                                             | Tr =25  | 4  | 3  | 3  | 3  | 3  | 3  | 1  | <b>0.83</b> |
|   |                                                             | Tr =100 | 4  | 1  | 1  | 1  | 1  | 1  | 3  | <b>0.48</b> |
| V | Protected areas                                             |         | 4  | 2  | 4  | 3  | 4  | 3  | 1  | <b>0.86</b> |
| V | Lithological characteristics                                |         | 4  | 4  | 4  | 1  | 1  | 2  | 2  | <b>0.66</b> |

**Table S2:** Determination of the “weight” for the socio-economical vulnerability “E”.

|   | INDICATOR              | RA | FP | SI | SC | DF | VS | Score | GS | CS   |
|---|------------------------|----|----|----|----|----|----|-------|----|------|
|   | Characteristic value   | 5  | 1  | 2  | 5  | 1  | 2  |       |    |      |
| E | Loss of the soil value | 4  | 4  | 4  | 4  | 4  | 4  | 64    | 1  | 1.00 |
| E | Touristic activities   | 4  | 4  | 4  | 4  | 4  | 4  | 64    | 2  | 1.00 |
| E | Productive activities  | 4  | 4  | 4  | 4  | 4  | 4  | 64    | 3  | 1.00 |
| E | Population             | 4  | 4  | 4  | 4  | 4  | 4  | 64    | 4  | 1.00 |

**Table S3:** Values of the different indicators and morphological vulnerability defined for each profile for the different return periods.

| MACRO-AREA  | Profiles | Tr  | I <sub>RU</sub> | I <sub>R</sub> | E <sub>LT</sub> | I <sub>D</sub> | I <sub>i</sub> |
|-------------|----------|-----|-----------------|----------------|-----------------|----------------|----------------|
| Macroarea 2 | P1       | 1   | 2               | 1              | 0               | 1              | 4              |
|             |          | 10  | 3               | 1              | 0               | 1              | 5              |
|             |          | 25  | 3               | 2              | 0               | 1              | 6              |
|             |          | 100 | 4               | 2              | 0               | 1              | 7              |
|             | P2       | 1   | 2               | 2              | 0               | 1              | 5              |
|             |          | 10  | 3               | 3              | 0               | 1              | 7              |
|             |          | 25  | 3               | 3              | 0               | 1              | 7              |
|             |          | 100 | 4               | 3              | 0               | 1              | 8              |
|             | P3       | 1   | 1               | 1              | 0               | 1              | 3              |
|             |          | 10  | 2               | 2              | 0               | 1              | 5              |
|             |          | 25  | 3               | 1              | 0               | 1              | 5              |
|             |          | 100 | 3               | 3              | 0               | 1              | 7              |
|             | P4       | 1   | 1               | 2              | 0               | 1              | 4              |
|             |          | 10  | 2               | 2              | 0               | 1              | 5              |
|             |          | 25  | 2               | 3              | 0               | 1              | 6              |
|             |          | 100 | 3               | 3              | 0               | 1              | 7              |
|             | P5       | 1   | 2               | 1              | 0               | 1              | 4              |
|             |          | 10  | 3               | 2              | 0               | 1              | 6              |
|             |          | 25  | 3               | 3              | 0               | 1              | 7              |
|             |          | 100 | 4               | 3              | 0               | 1              | 8              |
| Macroarea 3 | P6       | 1   | 3               | 1              | 0               | 0              | 4              |

|             |     |     |   |   |   |   |   |
|-------------|-----|-----|---|---|---|---|---|
| Macroarea 4 |     | 10  | 4 | 2 | 0 | 0 | 6 |
|             |     | 25  | 4 | 3 | 0 | 0 | 7 |
|             |     | 100 | 4 | 3 | 0 | 0 | 7 |
|             |     |     |   |   |   |   |   |
|             | P7  | 1   | 1 | 1 | 0 | 1 | 3 |
|             |     | 10  | 2 | 1 | 0 | 1 | 4 |
|             |     | 25  | 2 | 1 | 0 | 1 | 4 |
|             |     | 100 | 3 | 2 | 0 | 1 | 6 |
|             | P8  | 1   | 4 | 2 | 0 | 1 | 7 |
|             |     | 10  | 4 | 3 | 0 | 1 | 8 |
|             |     | 25  | 4 | 3 | 0 | 1 | 8 |
|             |     | 100 | 4 | 3 | 0 | 1 | 8 |
|             | P9  | 1   | 2 | 1 | 1 | 1 | 5 |
|             |     | 10  | 3 | 1 | 1 | 1 | 6 |
|             |     | 25  | 3 | 1 | 1 | 1 | 6 |
|             |     | 100 | 4 | 2 | 1 | 1 | 8 |
| Macroarea 5 | P10 | 1   | 3 | 3 | 1 | 0 | 7 |
|             |     | 10  | 4 | 3 | 1 | 0 | 8 |
|             |     | 25  | 4 | 3 | 1 | 0 | 8 |
|             |     | 100 | 4 | 3 | 1 | 0 | 8 |
| Macroarea 6 | P11 | 1   | 1 | 1 | 0 | 1 | 3 |
|             |     | 10  | 1 | 1 | 0 | 1 | 3 |
|             |     | 25  | 2 | 1 | 0 | 1 | 4 |
|             |     | 100 | 2 | 1 | 0 | 1 | 4 |
|             | P12 | 1   | 1 | 1 | 1 | 1 | 4 |
|             |     | 10  | 2 | 1 | 1 | 1 | 5 |
|             |     | 25  | 3 | 2 | 1 | 1 | 7 |
|             |     | 100 | 3 | 3 | 1 | 1 | 8 |
| Macroarea 7 | P13 | 1   | 4 | 3 | 1 | 1 | 9 |
|             |     | 10  | 4 | 3 | 1 | 1 | 9 |
|             |     | 25  | 4 | 3 | 1 | 1 | 9 |
|             |     | 100 | 4 | 3 | 1 | 1 | 9 |

**Table S4:** Flooding index, erosion Index, combine coastal risk index along the Basilicata Ionian coast.

|     |     | Scenario |      |      | Scenario |      |      | Scenario |      |      | Scenario |      |      |
|-----|-----|----------|------|------|----------|------|------|----------|------|------|----------|------|------|
|     |     | Tr=1 yr  |      |      | Tr=10    |      |      | Tr=25    |      |      | Tr=100   |      |      |
|     |     | ZPI      | ZEE  | ICC  |
| MA2 | P1- | ZPI4     | ZPE3 | ICC3 | ZPI3     | ZPE3 | ICC2 | ZPI2     | ZPE2 | ICC2 | ZPI2     | ZPE2 | ICC2 |
|     | P2  | ZPI3     | ZPE3 | ICC2 | ZPI2     | ZPE2 | ICC2 | ZPI2     | ZPE2 | ICC2 | ZPI1     | ZPE2 | ICC2 |
|     | P3  | ZPI4     | ZPE3 | ICC3 | ZPI3     | ZPE2 | ICC3 | ZPI3     | ZPE2 | ICC3 | ZPI2     | ZPE2 | ICC2 |
|     | P4  | ZPI4     | ZPE3 | ICC3 | ZPI3     | ZPE2 | ICC3 | ZPI2     | ZPE2 | ICC2 | ZPI2     | ZPE2 | ICC2 |
|     | P5  | ZPI4     | ZPE4 | ICC3 | ZPI2     | ZPE4 | ICC2 | ZPI2     | ZPE4 | ICC2 | ZPI1     | ZPE4 | ICC2 |
| MA3 | P6  | ZPI4     | ZPE3 | ICC3 | ZPI2     | ZPE3 | ICC2 | ZPI2     | ZPE3 | ICC2 | ZPI2     | ZPE3 | ICC2 |
|     | P7- | ZPI4     | ZPE3 | ICC3 | ZPI4     | ZPE3 | ICC3 | ZPI4     | ZPE3 | ICC3 | ZPI2     | ZPE3 | ICC2 |
| MA4 | P8- | ZPI3     | ZPE2 | ICC3 | ZPI2     | ZPE2 | ICC2 | ZPI2     | ZPE2 | ICC2 | ZPI2     | ZPE2 | ICC2 |
|     | P9  | ZPI4     | ZPE4 | ICC3 | ZPI3     | ZPE4 | ICC3 | ZPI3     | ZPE4 | ICC3 | ZPI2     | ZPE4 | ICC2 |
| MA5 | P10 | ZPI3     | ZPE4 | ICC3 | ZPI2     | ZPE4 | ICC2 | ZPI2     | ZPE4 | ICC2 | ZPI2     | ZPE4 | ICC2 |
| MA6 | P11 | ZPI4     | ZPE3 | ICC3 |
|     | P12 | ZPI4     | ZPE4 | ICC3 | ZPI4     | ZPE4 | ICC3 | ZPI3     | ZPE4 | ICC3 | ZPI2     | ZPE4 | ICC2 |
| MA7 | P13 | ZPI1     | ZPE4 | ICC2 |
